# Supplementary material for: Selection Signature and CRISPR/Cas9-Mediated Gene Knockout Analyses Reveal ZC3H10 Involved in Cold Adaptation in Chinese Native Cattle
Source: MDPI journal article supplement (doi:10.3390/genes13101910), 2022-10-20
Supplement: s1 [file s1]

**Table S1.** Information of 15 cattle breeds.

| Name              | Abbreviation | Breeds         | Sampling Location       | Group                     | Annual Average Temperature (°C) |
|-------------------|--------------|----------------|-------------------------|---------------------------|---------------------------------|
| Yanbian           | YB           | taurus         | Yanji, Jilin            | Cold-adapted              | 6.24                            |
| Hazake            | HSK          | taurus         | Qinghe, Xinjiang        | Cold-adapted              | 1.83                            |
| Aletai White      | ALT          | taurus         | Buerjin, Xinjiang       | cold-adapted              | 4.99                            |
| Xinjiang Brown    | XJB          | taurus         | Zhaosu, Xinjiang        | cold-adapted              | 4.2                             |
| Menggu            | MG           | taurus         | Huhehaote, Neimenggu    | cold-adapted              | 7.6                             |
| Tibetan           | TB           | taurus         | Lasha, Tibetan          | cold-adapted<br>(hypoxia) | 9.3                             |
| Fuzhou            | FZ           | taurus         | Wafangdian, Liaoning    | cold-adapted              | 10.3                            |
| Anxi              | AX           | taurus         | Jiuchuan, Gansu         | cold-adapted              | 8.23                            |
| Apeijiaza         | APJZ         | taurus*indicus | Gongbujiangda, Tibetan  | cold-adapted<br>(hypoxia) | 10.3                            |
| Shigatse Humped   | SGH          | Indicus*Taurus | Rikaze, Tibetan         | cold-adapted<br>(hypoxia) | 7.23                            |
| Leiqiong          | LQ           | indicus        | Haikou, Hainan          | heat                      | 24.73                           |
| Chuannan Mountain | CNSD         | Taurus*indicus | Gongxian, Sichuan       | heat                      | 18.6                            |
| liangshan         | LS           | Indicus*taurus | Puge, Sichuan           | heat                      | 18.1                            |
| Ji'an             | JA           | indicus        | Ningdou, Jiangxi        | heat                      | 20.2                            |
| Weizhou Yellow    | WZ           | indicus        | Weizhou island, Guangxi | heat                      | 23.6                            |

**Table S2.** Total RNA quality inspection results.

| Sample | OD260/280 | OD260/230 | Concentration (µg/µL) | Total (µg) | RIN |
|--------|-----------|-----------|-----------------------|------------|-----|
| KO1    | 1.8230    | 1.3740    | 0.0413                | 1.7338     | 9.2 |
| KO2    | 1.8710    | 1.3690    | 0.0540                | 2.2697     | 10  |
| KO1_LT | 1.9000    | 1.1540    | 0.0897                | 3.7666     | 10  |
| KO2_LT | 1.9310    | 1.5320    | 0.1022                | 4.2924     | 9.9 |
| WT1    | 2.0690    | 1.9490    | 0.2918                | 12.2539    | 10  |
| WT2    | 2.0290    | 1.7870    | 0.1761                | 7.3954     | 10  |
| WT1_LT | 2.0250    | 1.7660    | 0.1372                | 5.7607     | 10  |
| WT2_LT | 2.0380    | 1.8720    | 0.1513                | 6.3538     | 10  |

**Table S3.** Statistical table of transcriptome sequencing data.

| Sample | Raw Data |       | Valid Data |       | Valid Ratio(%) | Q30 (%) | GC Content (%) |
|--------|----------|-------|------------|-------|----------------|---------|----------------|
|        | Read     | Base  | Read       | Base  |                |         |                |
| KO1    | 50544962 | 7.58G | 49492652   | 7.42G | 97.92          | 98.20   | 50.50          |
| KO2    | 55618396 | 8.34G | 54438244   | 8.17G | 97.88          | 98.19   | 50.50          |
| KO1_LT | 49014610 | 7.35G | 47901990   | 7.19G | 97.73          | 98.03   | 50.50          |
| KO2_LT | 44226758 | 6.63G | 43258296   | 6.49G | 97.81          | 98.01   | 50.50          |
| WT1    | 50892458 | 7.63G | 49801824   | 7.47G | 97.86          | 98.11   | 49.50          |
| WT2    | 52407024 | 7.86G | 51282518   | 7.69G | 97.85          | 98.19   | 49.50          |
| WT1_LT | 50922318 | 7.64G | 49841978   | 7.48G | 97.88          | 98.21   | 49.50          |
| WT2_LT | 52042230 | 7.81G | 50931990   | 7.64G | 97.87          | 98.21   | 49.50          |

**Table S4.** Statistical table of reference genome alignment data.

| Sample | Valid Reads | Mapped Reads     | Unique Mapped Reads | Multi Mapped Reads |
|--------|-------------|------------------|---------------------|--------------------|
| KO1    | 49492652    | 48256512(97.50%) | 38114603(77.01%)    | 10141909(20.49%)   |
| KO2    | 54438244    | 53075602(97.50%) | 41795886(76.78%)    | 11279716(20.72%)   |
| KO1_LT | 47901990    | 46535667(97.15%) | 36444624(76.08%)    | 10091043(21.07%)   |
| KO2_LT | 43258296    | 42072595(97.26%) | 33154778(76.64%)    | 8917817(20.62%)    |
| WT1    | 49801824    | 48513425(97.41%) | 38533619(77.37%)    | 9979806(20.04%)    |
| WT2    | 51282518    | 50012783(97.52%) | 39676661(77.37%)    | 10336122(20.16%)   |
| WT1_LT | 49841978    | 48585916(97.48%) | 38403946(77.05%)    | 10181970(20.43%)   |
| WT2_LT | 50931990    | 49631851(97.45%) | 38989754(76.55%)    | 10642097(20.89%)   |
